# Supplementary material
Source: Springer Nature journal article supplement (https://www.springermedizin.de/resource/supplementary/12985_2011_1833_MOESM2_ESM.pdf/9610664)
Supplement: MOESM2 [file 9610664]

## (a) S

| Group    | Strain          | Sequence | Position |    |
|----------|-----------------|----------|----------|----|
| Group 1  | CY777           | .....    | 95       |    |
|          | LIC             | .....    | 95       |    |
|          | SM98            | .....    | 95       |    |
|          | R17/07          | .....    | 95       |    |
|          | attenuated_DR13 | .....    | 95       |    |
|          | MS              | .....    | 95       |    |
|          | 83P-5           | .....    | 95       |    |
|          | CH/IME/06       | .....    | 95       |    |
|          | CH/HLJG/2010    | .....    | 95       |    |
|          | CH/JL/09        | .....    | 95       |    |
| Group 2  | CH/GGS/09       | .....    | 95       |    |
|          | CH/HLJQ/2010    | .....    | 95       |    |
|          | CH/S            | .....    | 95       |    |
|          | S               | .....    | 95       |    |
|          | BJ-2011-1       | .....    | 95       |    |
|          | CH/HLJM/07      | .....    | 95       |    |
|          | BJ2010          | .....    | 95       |    |
|          | CH/FJND-3/2011  | .....    | 95       |    |
|          | J5-2004-2       | .....    | 95       |    |
|          | CH/JSK/06       | .....    | 95       |    |
| Group 3  | CH/HLJ/06       | .....    | 95       |    |
|          | CH/BNCB/06      | .....    | 95       |    |
|          | CH/GSJ/07       | .....    | 95       |    |
|          | LJB/03          | .....    | 95       |    |
|          | VIOLENT_DR13    | .....    | 95       |    |
|          | CHD-01          | .....    | 95       |    |
|          | Group 4         | CH/1M/06 | .....    | 95 |
|          |                 | CH/1L/09 | .....    | 95 |
|          |                 | CH/1G/06 | .....    | 95 |
|          |                 | CH/1K/07 | .....    | 95 |
| CH/1M/07 |                 | .....    | 95       |    |
| CH/1M/06 |                 | .....    | 95       |    |
| CH/1M/07 |                 | .....    | 95       |    |
| CH/1M/06 |                 | .....    | 95       |    |
| CH/1M/07 |                 | .....    | 95       |    |
| CH/1M/06 |                 | .....    | 95       |    |

## (b) ORF3

| Group    | Strain          | Sequence | Position |     |
|----------|-----------------|----------|----------|-----|
| Group 1  | CY777           | .....    | 100      |     |
|          | LIC             | .....    | 100      |     |
|          | SM98            | .....    | 100      |     |
|          | R17/07          | .....    | 100      |     |
|          | attenuated_DR13 | .....    | 100      |     |
|          | MS              | .....    | 100      |     |
|          | 83P-5           | .....    | 100      |     |
|          | CH/IME/06       | .....    | 100      |     |
|          | CH/HLJG/2010    | .....    | 100      |     |
|          | CH/JL/09        | .....    | 100      |     |
| Group 2  | CH/GGS/09       | .....    | 100      |     |
|          | CH/HLJQ/2010    | .....    | 100      |     |
|          | CH/S            | .....    | 100      |     |
|          | S               | .....    | 100      |     |
|          | BJ-2011-1       | .....    | 100      |     |
|          | CH/HLJM/07      | .....    | 100      |     |
|          | BJ2010          | .....    | 100      |     |
|          | CH/FJND-3/2011  | .....    | 100      |     |
|          | J5-2004-2       | .....    | 100      |     |
|          | CH/JSK/06       | .....    | 100      |     |
| Group 3  | CH/HLJ/06       | .....    | 100      |     |
|          | CH/BNCB/06      | .....    | 100      |     |
|          | CH/GSJ/07       | .....    | 100      |     |
|          | LJB/03          | .....    | 100      |     |
|          | VIOLENT_DR13    | .....    | 100      |     |
|          | CHD-01          | .....    | 100      |     |
|          | Group 4         | CH/1M/06 | .....    | 100 |
|          |                 | CH/1L/09 | .....    | 100 |
|          |                 | CH/1G/06 | .....    | 100 |
|          |                 | CH/1K/07 | .....    | 100 |
| CH/1M/07 |                 | .....    | 100      |     |
| CH/1M/06 |                 | .....    | 100      |     |
| CH/1M/07 |                 | .....    | 100      |     |
| CH/1M/06 |                 | .....    | 100      |     |
| CH/1M/07 |                 | .....    | 100      |     |
| CH/1M/06 |                 | .....    | 100      |     |

## (c) N

| Group    | Strain          | Sequence | Position |     |
|----------|-----------------|----------|----------|-----|
| Group 1  | CY777           | .....    | 420      |     |
|          | LIC             | .....    | 420      |     |
|          | SM98            | .....    | 420      |     |
|          | R17/07          | .....    | 420      |     |
|          | attenuated_DR13 | .....    | 420      |     |
|          | MS              | .....    | 420      |     |
|          | 83P-5           | .....    | 420      |     |
|          | CH/IME/06       | .....    | 420      |     |
|          | CH/HLJG/2010    | .....    | 420      |     |
|          | CH/JL/09        | .....    | 420      |     |
| Group 2  | CH/GGS/09       | .....    | 420      |     |
|          | CH/HLJQ/2010    | .....    | 420      |     |
|          | CH/S            | .....    | 420      |     |
|          | S               | .....    | 420      |     |
|          | BJ-2011-1       | .....    | 420      |     |
|          | CH/HLJM/07      | .....    | 420      |     |
|          | BJ2010          | .....    | 420      |     |
|          | CH/FJND-3/2011  | .....    | 420      |     |
|          | J5-2004-2       | .....    | 420      |     |
|          | CH/JSK/06       | .....    | 420      |     |
| Group 3  | CH/HLJ/06       | .....    | 420      |     |
|          | CH/BNCB/06      | .....    | 420      |     |
|          | CH/GSJ/07       | .....    | 420      |     |
|          | LJB/03          | .....    | 420      |     |
|          | VIOLENT_DR13    | .....    | 420      |     |
|          | CHD-01          | .....    | 420      |     |
|          | Group 4         | CH/1M/06 | .....    | 420 |
|          |                 | CH/1L/09 | .....    | 420 |
|          |                 | CH/1G/06 | .....    | 420 |
|          |                 | CH/1K/07 | .....    | 420 |
| CH/1M/07 |                 | .....    | 420      |     |
| CH/1M/06 |                 | .....    | 420      |     |
| CH/1M/07 |                 | .....    | 420      |     |
| CH/1M/06 |                 | .....    | 420      |     |
| CH/1M/07 |                 | .....    | 420      |     |
| CH/1M/06 |                 | .....    | 420      |     |
